# Supplementary material
Source: PubMed Central journal article supplement (PMC6439605)
Supplement: jama-321-665-s003.pdf [file jama-321-665-s003.pdf]

## Data Sharing Statement

Wade. Effect of a Nurse-Led Preventive Psychological Intervention on Symptoms of Posttraumatic Stress Disorder Among Critically Ill Patients. *JAMA*. Published February 18, 2019.  
10.1001/jama.2019.0073

### Data

**Data available:** Yes

**Data types:** Deidentified participant data, Data dictionary

**How to access data:** Requests to be sent to the Chief Investigator for access to the anonymous participant data.

**When available:** beginning date: 01-01-2021

### Supporting Documents

**Document types:** None

### Additional Information

**Who can access the data:** Data will be made available to researchers whose proposed use of the data has been approved.

**Types of analyses:** Data will be made available for the advancement of medical research in line with a Data Use Agreement

**Mechanisms of data availability:** Data will be made available in line with a Data Use Agreement

**Any additional restrictions:** None.
